# Supplementary material for: Variation in the Heritability of Child Body Mass Index by Obesogenic Home Environment
Source: PubMed Central journal article supplement (PMC6396810; doi:10.1001/jamapediatrics.2018.1508), 2018-10-01
Supplement: jamapediatr-172-1153-s001.pdf [file jamapediatr-172-1153-s001.pdf]

## Supplementary Online Content

Schrepft S, van Jaarsveld CHM, Fisher A, et al. Variation in the heritability of child body mass index by obesogenic home environment. *JAMA Pediatr*. Published online October 1, 2018. doi:10.1001/jamapediatrics.2018.1508

**eTable 1.** Constructs included in the home environment composite scores

**eTable 2.** Overview of the study measures and assessment points in Gemini

**eTable 3.** Comparison of the study sample and the total HEI sample on the study variables

**eFigure 1.** Heterogeneity model for higher-risk and lower-risk obesogenic home environments

This supplementary material has been provided by the authors to give readers additional information about their work.

**eTable 1. Constructs included in the home environment composite scores**

| <b>Food-related constructs</b>                           |
|----------------------------------------------------------|
| <b><i>Availability</i></b>                               |
| Number of fruit types <sup>1</sup>                       |
| Number of vegetable types <sup>1</sup>                   |
| Number of energy-dense snack types                       |
| Presence of sugar-sweetened drinks                       |
| <b><i>Accessibility (visibility)</i></b>                 |
| Fruit on display <sup>1</sup>                            |
| Vegetables ready-to-eat <sup>1</sup>                     |
| Energy-dense snacks on display                           |
| Sugar-sweetened drinks on display                        |
| <b><i>Accessibility (child can help him/herself)</i></b> |
| Fruit <sup>1</sup>                                       |
| Vegetables <sup>1</sup>                                  |
| Energy-dense snacks                                      |
| Sugar-sweetened drinks                                   |
| <b><i>Parental feeding practices</i></b>                 |
| Emotional feeding                                        |
| Instrumental feeding                                     |
| Encouragement <sup>1</sup>                               |
| Modelling <sup>1</sup>                                   |
| Monitoring <sup>1</sup>                                  |
| Covert restriction <sup>1</sup>                          |
| Restriction <sup>1</sup>                                 |
| Family meal frequency                                    |
| Frequency child eats while watching TV                   |
| <b>Physical activity-related constructs</b>              |
| Garden/outdoor space <sup>1</sup>                        |
| Garden play equipment <sup>1</sup>                       |
| Allowed to play indoors <sup>1</sup>                     |
| Allowed to play outdoors <sup>1</sup>                    |
| Parental modelling of physical activity <sup>1</sup>     |
| Parental support of physical activity <sup>1</sup>       |
| <b>Media-related constructs</b>                          |
| Number of media equipment                                |
| TV in the child's bedroom                                |
| Household rules around media use <sup>1</sup>            |
| Maternal TV viewing                                      |
| Partner TV viewing                                       |

<sup>1</sup> Variable was identified as being associated with decreased risk for weight gain.

**eTable 2. Overview of the study measures and assessment points in Gemini**

|                                 | Child age in months (measurement point) |            |            |            |            |            |            |            |
|---------------------------------|-----------------------------------------|------------|------------|------------|------------|------------|------------|------------|
|                                 | 8<br>(T0)                               | 15<br>(T1) | 20<br>(T2) | 24<br>(T3) | 30<br>(T4) | 36<br>(T5) | 48<br>(T6) | 60<br>(T7) |
| Home environment                |                                         |            |            |            |            |            | X          |            |
| Sex of twin pair                | X                                       |            |            |            |            |            |            |            |
| Zygoty                          | X                                       |            |            |            | X          |            |            |            |
| DNA collection using cheek swab |                                         |            |            |            | X          |            |            |            |
| Gestational age                 | X                                       |            |            |            |            |            |            |            |
| Anthropometrics                 | X                                       | X          |            | X          |            | X          | X          | X          |

**eTable 3. Comparison of the study sample and the total HEI sample on the study variables**

|                                                  | <b>Study Sample,<br/>% of Families<br/>(No.)<br/>(n = 925)</b> | <b>Total HEI<br/>Sample, % of<br/>Families (No.)<br/>(n = 1113)</b> | <b>P difference<sup>a</sup></b> |
|--------------------------------------------------|----------------------------------------------------------------|---------------------------------------------------------------------|---------------------------------|
| <b>Overall home environment</b>                  |                                                                |                                                                     | 0.738                           |
| Lower risk                                       | 54.9 (508)                                                     | 54.2 (603)                                                          |                                 |
| Higher risk                                      | 45.1 (417)                                                     | 45.8 (510)                                                          |                                 |
| <b>Home food environment</b>                     |                                                                |                                                                     | 0.915                           |
| Lower risk                                       | 51.8 (479)                                                     | 52.0 (579)                                                          |                                 |
| Higher risk                                      | 48.2 (446)                                                     | 48.0 (534)                                                          |                                 |
| <b>Home activity environment</b>                 |                                                                |                                                                     | 0.984                           |
| Lower risk                                       | 57.2 (529)                                                     | 57.2 (637)                                                          |                                 |
| Higher risk                                      | 42.8 (396)                                                     | 42.8 (476)                                                          |                                 |
| <b>Home media environment</b>                    |                                                                |                                                                     | 0.426                           |
| Lower risk                                       | 57.7 (534)                                                     | 56.0 (623)                                                          |                                 |
| Higher risk                                      | 42.3 (391)                                                     | 44.0 (490)                                                          |                                 |
| <b>Sex of twin pair</b>                          |                                                                |                                                                     | 0.986                           |
| Male                                             | 33.9 (314)                                                     | 33.7 (375)                                                          |                                 |
| Female                                           | 35.0 (324)                                                     | 35.0 (389)                                                          |                                 |
| Opposite sex                                     | 31.0 (287)                                                     | 31.4 (349)                                                          |                                 |
| <b>Zygoty</b>                                    |                                                                |                                                                     | 0.957                           |
| Monozygotic                                      | 33.9 (314)                                                     | 33.7 (375)                                                          |                                 |
| Dizygotic                                        | 66.1 (611)                                                     | 65.2 (726)                                                          |                                 |
| Unknown                                          | -                                                              | 1.1 (12)                                                            |                                 |
| <b>Gestational age (weeks), mean (SD)</b>        | 36.3 (2.47)                                                    | 36.2 (2.54) <sup>b</sup>                                            | 0.432                           |
| <b>Age at BMI measurement (years), mean (SD)</b> | 3.8 (0.35)                                                     | 3.8 (0.35) <sup>c</sup>                                             | 1.000                           |
| <b>4-year BMI SDS, mean (SD)</b>                 | -0.04 (1.02)                                                   | -0.04 (1.02) <sup>d</sup>                                           | 0.995                           |

HEI = Home Environment Interview; BMI = body mass index; SD = standard deviation.

<sup>a</sup>The characteristics of those living in higher- versus lower-risk home environments were compared using  $\chi^2$  for categorical variables and t-tests for continuously distributed variables. One twin was selected at random to avoid clustering effects.

<sup>b</sup> N = 1106 (7 missing cases).

<sup>c</sup> N = 937 (176 missing cases).

<sup>d</sup> N = 936 (177 missing cases).

**eFigure 1. Heterogeneity model for higher-risk and lower-risk obesogenic home environments**

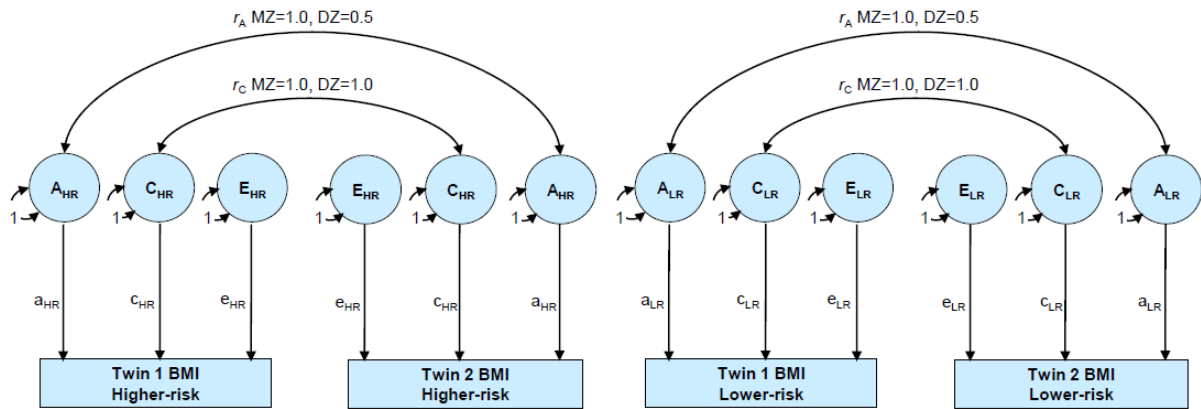

The circles indicate latent influences on measured BMI for each twin, which include additive genetic effects (A), shared environmental effects (C), and unique environmental effects (E) for twin pairs in higher-risk and lower-risk home environments separately (subscript HR or LR, respectively), which permits the evaluation of differences in the effect sizes of the parameters by home environment. The straight single-headed arrows show the causal paths (path coefficients  $a$ ,  $c$ , and  $e$ ) which indicate the relative influence of the latent variables on measured BMI for twin pairs in higher-risk and lower-risk environments separately (subscript HR or LR, respectively); the square of each of the path coefficients provides the variance explained for each parameter.  $r_A$  is the genetic correlation for DZ and MZ twin pairs (MZ=1.0, DZ=0.5) and  $r_C$  is the shared environmental correlation for DZ and MZ twin pairs (MZ and DZ=1.0).
